# Supplementary material
Source: publisher figshare collection journal article supplement (https://asha.figshare.com/articles/dataset/_/23880465)
Supplement: Supplementary file 1 [file 1]

**Supplemental Material S1.** Full electronic database search strategy for the four databases.

Table of the full electronic search strategy, along with the search fields and limits specified, for the four Linguistics and Language Behavior Abstracts (LLBA), Educational Resources Information Center (ERIC), MLA International Bibliography (MLA) and PsycINFO (ProQuest) databases.

| Database Search Terms                                                                                                                                                                                                                                                                                                                                                                                                                                                                                                                                 |                                                                                                                                                                                                                                                                                                                                                                                                                                                                                                                                                                                        |                                                                                                                                                                                                                                                                                                                                                                                                                                                                                                                          |                                                                                                                                                                                                                                                                                                                                                                                                                                                                                                                          | Search Fields | Search Limits |
|-------------------------------------------------------------------------------------------------------------------------------------------------------------------------------------------------------------------------------------------------------------------------------------------------------------------------------------------------------------------------------------------------------------------------------------------------------------------------------------------------------------------------------------------------------|----------------------------------------------------------------------------------------------------------------------------------------------------------------------------------------------------------------------------------------------------------------------------------------------------------------------------------------------------------------------------------------------------------------------------------------------------------------------------------------------------------------------------------------------------------------------------------------|--------------------------------------------------------------------------------------------------------------------------------------------------------------------------------------------------------------------------------------------------------------------------------------------------------------------------------------------------------------------------------------------------------------------------------------------------------------------------------------------------------------------------|--------------------------------------------------------------------------------------------------------------------------------------------------------------------------------------------------------------------------------------------------------------------------------------------------------------------------------------------------------------------------------------------------------------------------------------------------------------------------------------------------------------------------|---------------|---------------|
| Linguistics and Language Behavior Abstracts (LLBA)                                                                                                                                                                                                                                                                                                                                                                                                                                                                                                    | Educational Resources Information Center (ERIC)                                                                                                                                                                                                                                                                                                                                                                                                                                                                                                                                        | MLA International Bibliography (MLA)                                                                                                                                                                                                                                                                                                                                                                                                                                                                                     | PsycINFO (ProQuest)                                                                                                                                                                                                                                                                                                                                                                                                                                                                                                      |               |               |
| (Phonological Awareness OR phonem* awareness OR letter knowledge OR grapheme knowledge OR Grapheme Phoneme Correspondence OR sound symbol* OR Serial Recall OR Oral Comprehension OR Verbal Comprehension OR Listening Comprehension OR Vocabulary OR Word Knowledge OR grammar OR Syntax OR Syntac* OR Synta* OR Morpholog* OR Morphem* OR Visual Short Term Memory OR Phonological Short Term Memory OR Short Term Memory OR Working Memory OR Visual Memory OR Verbal Memory OR Nonverbal Memory OR Nonverbal Ability OR Nonverbal Intelligence OR | (Phonological Awareness OR phonem* awareness OR letter knowledge OR grapheme knowledge OR Grapheme Phoneme Correspondence OR sound symbol* OR Serial Recall OR Oral Comprehension OR Verbal Comprehension OR Listening Comprehension OR Vocabulary OR Word Knowledge OR grammar OR Syntax OR Syntac* OR Synta* OR Morpholog* OR Morphem* OR Visual Short Term Memory OR Phonological Short Term Memory OR Short Term Memory OR Working Memory OR Visual Memory OR Verbal Memory OR Nonverbal Memory OR Nonverbal Ability OR Nonverbal IQ OR Precursor Literacy OR Precursor Reading OR | (Phonological Awareness OR phonem* awareness OR letter knowledge OR grapheme knowledge OR Grapheme Phoneme Correspondence OR sound symbol* OR Serial Recall OR Oral Comprehension OR Verbal Comprehension OR Listening Comprehension OR Vocabulary OR Word Knowledge OR grammar OR Syntax OR Syntac* OR Synta* OR Morpholog* OR Morphem* OR Visual Short Term Memory OR Phonological Short Term Memory OR Short Term Memory OR Working Memory OR Visual Memory OR Verbal Memory OR Nonverbal Memory OR Nonverbal Ability | (Phonological Awareness OR phonem* awareness OR letter knowledge OR grapheme knowledge OR Grapheme Phoneme Correspondence OR sound symbol* OR Serial Recall OR Oral Comprehension OR Verbal Comprehension OR Listening Comprehension OR Vocabulary OR Word Knowledge OR grammar OR Syntax OR Syntac* OR Synta* OR Morpholog* OR Morphem* OR Visual Short Term Memory OR Phonological Short Term Memory OR Short Term Memory OR Working Memory OR Visual Memory OR Verbal Memory OR Nonverbal Memory OR Nonverbal Ability | All           | None          |

|                                                                                                                                                                                                                                                                                                                                                                                                                                                                                                                                                                                 |                                                                                                                                                                                                                                                                                                                                                                                                                                                                                                                      |                                                                                                                                                                                                                                                                                                                                                                                                                                                                                                                                                                                                              |                                                                                                                                                                                                                                                                                                                                                                                                                                                                                                                                                                                                              |
|---------------------------------------------------------------------------------------------------------------------------------------------------------------------------------------------------------------------------------------------------------------------------------------------------------------------------------------------------------------------------------------------------------------------------------------------------------------------------------------------------------------------------------------------------------------------------------|----------------------------------------------------------------------------------------------------------------------------------------------------------------------------------------------------------------------------------------------------------------------------------------------------------------------------------------------------------------------------------------------------------------------------------------------------------------------------------------------------------------------|--------------------------------------------------------------------------------------------------------------------------------------------------------------------------------------------------------------------------------------------------------------------------------------------------------------------------------------------------------------------------------------------------------------------------------------------------------------------------------------------------------------------------------------------------------------------------------------------------------------|--------------------------------------------------------------------------------------------------------------------------------------------------------------------------------------------------------------------------------------------------------------------------------------------------------------------------------------------------------------------------------------------------------------------------------------------------------------------------------------------------------------------------------------------------------------------------------------------------------------|
| Nonverbal IQ OR Precursor Literacy OR Precursor Reading OR Predictor Literacy OR Predictor Reading OR Precursor Literacy Skills OR Precursors of Reading Ability OR Early Predictors of Later Conventional Literacy Skills OR Predictive Literacy Skills OR Predictors of Later Reading Skills OR Preschool Literacy) AND (Word Decoding OR Reading Fluency OR Word Recognition OR Reading Ability OR Reading Skills OR Literacy Skills OR Reading Comprehension) AND mainsubject (Child* OR Infants) AND mainsubject (Bilingual* OR Multilingual* OR Second Language Learner*) | Predictor Literacy OR Predictor Reading OR Precursor Literacy Skills OR Precursors of Reading Ability OR Early Predictors of Later Conventional Literacy Skills OR Predictive Literacy Skills OR Predictors of Later Reading Skills OR Preschool Literacy) AND (Word Decoding OR Reading Fluency OR Word Recognition OR Reading Ability OR Reading Skills OR Literacy Skills OR Reading Comprehension) AND mainsubject (Child* OR Infants) AND mainsubject (Bilingual* OR Multilingual* OR Second Language Learner*) | OR Nonverbal Intelligence OR Nonverbal IQ OR Precursor Literacy OR Precursor Reading OR Predictor Literacy OR Predictor Reading OR Precursor Literacy Skills OR Precursors of Reading Ability OR Early Predictors of Later Conventional Literacy Skills OR Predictive Literacy Skills OR Predictors of Later Reading Skills OR Preschool Literacy) AND (Word Decoding OR Reading Fluency OR Word Recognition OR Reading Ability OR Reading Skills OR Literacy Skills OR Reading Comprehension) AND mainsubject (Child* OR Infants) AND mainsubject (Bilingual* OR Multilingual* OR Second Language Learner*) | OR Nonverbal Intelligence OR Nonverbal IQ OR Precursor Literacy OR Precursor Reading OR Predictor Literacy OR Predictor Reading OR Precursor Literacy Skills OR Precursors of Reading Ability OR Early Predictors of Later Conventional Literacy Skills OR Predictive Literacy Skills OR Predictors of Later Reading Skills OR Preschool Literacy) AND (Word Decoding OR Reading Fluency OR Word Recognition OR Reading Ability OR Reading Skills OR Literacy Skills OR Reading Comprehension) AND mainsubject (Child* OR Infants) AND mainsubject (Bilingual* OR Multilingual* OR Second Language Learner*) |
|---------------------------------------------------------------------------------------------------------------------------------------------------------------------------------------------------------------------------------------------------------------------------------------------------------------------------------------------------------------------------------------------------------------------------------------------------------------------------------------------------------------------------------------------------------------------------------|----------------------------------------------------------------------------------------------------------------------------------------------------------------------------------------------------------------------------------------------------------------------------------------------------------------------------------------------------------------------------------------------------------------------------------------------------------------------------------------------------------------------|--------------------------------------------------------------------------------------------------------------------------------------------------------------------------------------------------------------------------------------------------------------------------------------------------------------------------------------------------------------------------------------------------------------------------------------------------------------------------------------------------------------------------------------------------------------------------------------------------------------|--------------------------------------------------------------------------------------------------------------------------------------------------------------------------------------------------------------------------------------------------------------------------------------------------------------------------------------------------------------------------------------------------------------------------------------------------------------------------------------------------------------------------------------------------------------------------------------------------------------|

*Note.* AND = mandatory search terms; OR = optional search terms; \* = truncation symbol to retrieve multiple search terms with a common root in the Linguistics and Language Behavior Abstracts, Educational Resources Information Center, MLA International Bibliography and PsycINFO (ProQuest) electronic databases.
