# Supplementary material
Source: publisher figshare collection journal article supplement (https://asha.figshare.com/articles/dataset/_/23880465)
Supplement: Supplementary file 2 [file 1]

**Supplemental Material S3.** Database search terms for literacy precursors, literacy outcome measures, and participant demographic characteristics.

Table of database search terms for the nine code-related, oral-language, and domain-general cognitive literacy precursors (phonological awareness, letter knowledge, RAN/serial recall, oral language/listening comprehension, vocabulary, grammar, memory, nonverbal intelligence and word decoding) and general/additional literacy precursors, two literacy outcome measures (word/nonword reading and text reading comprehension) and participant characteristics (age and type of language background) for the four Linguistics and Language Behavior Abstracts (LLBA), Educational Resources Information Center (ERIC), MLA International Bibliography (MLA) and PsycINFO (ProQuest) databases.

| Literacy Precursors | Phonological Awareness | Letter Knowledge                | RAN/ Serial Recall | Oral Language/Listening Comprehension | Vocabulary     | Grammar    | Memory                         | Nonverbal Intelligence | Word Decoding    | General Literacy Precursors |
|---------------------|------------------------|---------------------------------|--------------------|---------------------------------------|----------------|------------|--------------------------------|------------------------|------------------|-----------------------------|
| Search Query        | Phonological Awareness | Letter Knowledge                | Serial Recall      | Oral Comprehension                    | Vocabulary     | Grammar    | Visual Short-Term Memory       | Nonverbal Ability      | Word Decoding    | Precursor Literacy          |
|                     | Phonem* Awareness      | Grapheme Knowledge              |                    | Verbal Comprehension                  | Word Knowledge | Syntax     | Phonological Short-Term Memory | Nonverbal Intelligence | Reading Fluency  | Precursor Reading           |
|                     |                        | Phoneme Grapheme Correspondence |                    | Listening Comprehension               |                | Syntac*    | Short Term Memory              | Nonverbal IQ           | Word Recognition | Predictor Literacy          |
|                     |                        | Sound Symbol*                   |                    |                                       |                | Synta*     | Working Memory                 |                        | Reading Ability  | Predictor Reading           |
|                     |                        |                                 |                    |                                       |                | Morpholog* | Visual Memory                  |                        | Reading Skills   | Precursor Literacy Skills   |

|                                         |                                  |                                                        |                                                                                                                                                              |
|-----------------------------------------|----------------------------------|--------------------------------------------------------|--------------------------------------------------------------------------------------------------------------------------------------------------------------|
| Search Query                            |                                  | Nonverbal Memory                                       | Early Predictors of Later Conventional Literacy Skills<br><br>Predictive Literacy Skills<br><br>Predictors of Later Reading Skills<br><br>Preschool Literacy |
| Literacy Outcomes                       | Word/Nonword Decoding or Reading | Reading Comprehension                                  |                                                                                                                                                              |
| Search Query                            | Word Decoding                    | Reading Comprehension                                  |                                                                                                                                                              |
|                                         | Reading Fluency                  |                                                        |                                                                                                                                                              |
|                                         | Word Recognition                 |                                                        |                                                                                                                                                              |
|                                         | Reading Ability                  |                                                        |                                                                                                                                                              |
|                                         | Reading Skills                   |                                                        |                                                                                                                                                              |
|                                         | Literacy Skills                  |                                                        |                                                                                                                                                              |
| Participant Demographic Characteristics | Age Demographic (Children)       | Type of Language Background (Multilinguals/Bilinguals) |                                                                                                                                                              |
| Search Query                            | Child*                           | Bilingual*                                             |                                                                                                                                                              |
|                                         | Infants                          | Multilingual*                                          |                                                                                                                                                              |
|                                         |                                  | Second Language Learner*                               |                                                                                                                                                              |

*Note.* \* = truncation symbol to retrieve multiple search terms with a common root in the electronic databases.
