# Supplementary material
Source: publisher figshare collection journal article supplement (https://asha.figshare.com/articles/dataset/_/23880465)
Supplement: Supplementary file 4 [file 1]

|                                                |                                                  |                                                  |                                                               |  |                                                                                                                                                       |
|------------------------------------------------|--------------------------------------------------|--------------------------------------------------|---------------------------------------------------------------|--|-------------------------------------------------------------------------------------------------------------------------------------------------------|
| <b>Expressive Vocabulary</b> ( <i>n</i> = 2)   |                                                  | 33 <sup>PL &amp; OL</sup> (English and Chinese); | 33 <sup>PL &amp; OL</sup> (English and Chinese)               |  |                                                                                                                                                       |
|                                                |                                                  | 38 <sup>PL &amp; OL</sup> (English and Chinese)  | *English vocabulary – Chinese reading                         |  |                                                                                                                                                       |
| <b>Syntactic Awareness</b> ( <i>n</i> = 2)     | 33 <sup>PL &amp; OL</sup> (*English and Chinese) | 17 <sup>PL &amp; OL</sup> (Italian and English)  | 17 <sup>PL &amp; OL</sup> (Italian and English)               |  |                                                                                                                                                       |
|                                                |                                                  |                                                  | *English syntactic awareness- Italian reading                 |  |                                                                                                                                                       |
| <b>Morphological Awareness</b> ( <i>n</i> = 5) | 35 <sup>PL &amp; OL</sup> (*English)             | 3 <sup>PL &amp; OL</sup> (Chinese and English);  | 40 <sup>PL &amp; OL</sup> (Spanish and English)               |  | 33 <sup>PL &amp; OL</sup> (English and Chinese)<br>3 <sup>PL &amp; OL</sup> (Chinese and English);<br>33 <sup>PL &amp; OL</sup> (English and Chinese) |
|                                                |                                                  | 33 <sup>PL &amp; OL</sup> (English and Chinese); |                                                               |  |                                                                                                                                                       |
|                                                |                                                  | 38 <sup>PL &amp; OL</sup> (English and Chinese); |                                                               |  |                                                                                                                                                       |
|                                                |                                                  | 40 <sup>PL &amp; OL</sup> (Spanish and English)  |                                                               |  |                                                                                                                                                       |
| <b>Working Memory</b> ( <i>n</i> = 2)          |                                                  | 33 <sup>PL &amp; OL</sup> (English and Chinese)  | 17 <sup>PL &amp; OL</sup> (Italian and English)               |  |                                                                                                                                                       |
|                                                |                                                  |                                                  | *English working memory- Italian reading;                     |  |                                                                                                                                                       |
|                                                |                                                  |                                                  | 33 <sup>PL &amp; OL</sup> (English and Chinese)               |  |                                                                                                                                                       |
| <b>Nonverbal Intelligence</b> ( <i>n</i> = 2)  | 33 <sup>PL &amp; OL</sup> (*English and Chinese) | 38*Chinese-English                               | * Chinese working memory- English reading                     |  |                                                                                                                                                       |
|                                                |                                                  |                                                  | 33 <sup>PL &amp; OL</sup> (English and Chinese)               |  |                                                                                                                                                       |
|                                                |                                                  |                                                  | *Chinese non-verbal intelligence vocabulary – English reading |  |                                                                                                                                                       |
| <b>Word/Nonword Decoding</b> ( <i>n</i> = 2)   |                                                  | 33 <sup>PL &amp; OL</sup> (English and Chinese); | 40 <sup>PL &amp; OL</sup> (Spanish and English)               |  | 33 <sup>PL &amp; OL</sup> (English and Chinese)                                                                                                       |
|                                                |                                                  | 40 <sup>PL &amp; OL</sup> (Spanish and English)  |                                                               |  |                                                                                                                                                       |
| <b>Semantic Awareness</b> ( <i>n</i> = 1)      |                                                  |                                                  |                                                               |  | 7(French-English bilinguals)                                                                                                                          |
| <b>Spelling</b> ( <i>n</i> = 2)                |                                                  | 17 <sup>PL &amp; OL</sup> (Italian and English); | 17 <sup>PL &amp; OL</sup> (Italian and English)               |  | <sup>PL &amp; OL</sup> (French and English)                                                                                                           |
|                                                |                                                  | 38*Chinese-English                               |                                                               |  |                                                                                                                                                       |
| <b>VA Span</b> ( <i>n</i> = 1)                 |                                                  | 15 <sup>PL &amp; OL</sup> (Spanish and French)   | 15 <sup>PL &amp; OL</sup> (Spanish and French)                |  |                                                                                                                                                       |
|                                                |                                                  | 38 <sup>PL &amp; OL</sup> (English and Chinese)  |                                                               |  |                                                                                                                                                       |
| <b>Orthographic Processing</b> ( <i>n</i> = 1) |                                                  |                                                  |                                                               |  |                                                                                                                                                       |
| <b>Name Writing</b> ( <i>n</i> = 1)            | 13 <sup>OL</sup> (*Maya and Spanish)             |                                                  |                                                               |  |                                                                                                                                                       |

*Note.* <sup>+</sup>= Studies (7, 15, 22) that only assessed phonemic awareness; <sup>PL</sup>= (precursor language) indicates language assessed for literacy precursor measures; <sup>OL</sup>= (outcome language) indicates language assessed for reading outcome measures; <sup>^</sup>= literacy precursor assessed in both bilingual languages, but only statistically analyzed in one bilingual language; \*= language(s) with significant precursor-outcome associations, for precursors assessed in both languages but only significant in one language. The term *significant within-language precursor-outcome associations for one language* refers to literacy precursor and reading outcome measures assessed in the same language and significant in one language. The term *significant within-language precursor-outcome associations for both languages* refers to measures assessed in the same language and significant in both languages. The term *significant across-language precursor-outcome associations for literacy outcomes in one language* refers to precursor and outcome measures assessed in different languages, and significant for outcomes in one language. The term *significant cross-language precursor-outcome associations for literacy outcomes in both languages* refers to precursor and outcome measures assessed in different languages, and significant for outcomes in both languages.
