# Supplementary material
Source: publisher figshare collection journal article supplement (https://asha.figshare.com/articles/dataset/_/23880465)
Supplement: Supplementary file 6 [file 1]

## **Supplemental Material S2. General database search syntax.**

Note: For purposes of our database search, "OR" is used to specify terms that are optional or alternatives for a specified term while "AND" specifies terms that are mandatory.

### ***Database Search of the 8 Code-Related, Oral-Language, and Domain-General Cognitive Literacy Precursors (in Relation to Word/Nonword Decoding or Reading)***

(Phonological Awareness OR phonem\* awareness OR letter knowledge OR grapheme knowledge OR Grapheme Phoneme Correspondence OR sound symbol\* OR Serial Recall OR Oral Comprehension OR Verbal Comprehension OR Listening Comprehension OR Vocabulary OR Word Knowledge OR grammar OR Syntax OR Syntac\* OR Synta\* OR Morpholog\* OR Morphem\* OR Visual Short Term Memory OR Phonological Short Term Memory OR Short Term Memory OR Working Memory OR Visual Memory OR Verbal Memory OR Nonverbal Memory OR Nonverbal Ability OR Nonverbal Intelligence OR Nonverbal IQ) AND (Word Decoding OR Reading Fluency OR Word Recognition OR Reading Ability OR Reading Skills OR Literacy Skills) AND (mainsubject(Child\*) OR mainsubject(Infants)) AND (mainsubject(Bilingual\*) OR mainsubject(Multilingual\*) OR mainsubject(Second Language Learner\*))

### ***Database Search of the 9 Code-Related, Oral-Language, and Domain-General Cognitive Literacy Precursors (in Relation to Reading Comprehension)***

(Phonological Awareness OR phonem\* awareness OR letter knowledge OR grapheme knowledge OR Grapheme Phoneme Correspondence OR sound symbol\* OR Serial Recall OR Oral Comprehension OR Verbal Comprehension OR Listening Comprehension OR Vocabulary OR Word Knowledge OR grammar OR Syntax OR Syntac\* OR Synta\* OR Morpholog\* OR Morphem\* OR Visual Short Term Memory OR Phonological Short Term Memory OR Short Term Memory OR Working Memory OR Visual Memory OR Verbal Memory OR Nonverbal Memory OR Nonverbal Ability OR Nonverbal Intelligence OR Nonverbal IQ OR Word Decoding OR Reading Fluency OR Word Recognition OR Reading Ability OR Reading Skills OR Literacy Skills) AND (Reading Comprehension) AND (mainsubject(Child\*) OR mainsubject(Infants)) AND (mainsubject(Bilingual\*) OR mainsubject(Multilingual\*) OR mainsubject(Second Language Learner\*))

### ***Database Search of General/Additional Literacy Precursors (in Relation to Word/Nonword Decoding or Reading)***

(Precursor Literacy OR Precursor Reading OR Predictor Literacy OR Predictor Reading OR Precursor Literacy Skills OR Precursors of Reading Ability OR Early Predictors of Later Conventional Literacy Skills OR Predictive Literacy

Skills OR Predictors of Later Reading Skills OR Preschool Literacy) AND (Word Decoding OR Reading Fluency OR Word Recognition OR Reading Ability OR Reading Skills OR Literacy Skills) AND (mainsubject(Child\*) OR mainsubject(Infants)) AND (mainsubject(Bilingual\*) OR mainsubject(Multilingual\*) OR mainsubject(Second Language Learner\*))

***Database Search of General/Additional Literacy Precursors (in Relation to Reading Comprehension)***

(Precursor Literacy OR Precursor Reading OR Predictor Literacy OR Predictor Reading OR Precursor Literacy Skills OR Precursors of Reading Ability OR Early Predictors of Later Conventional Literacy Skills OR Predictive Literacy Skills OR Predictors of Later Reading Skills OR Preschool Literacy) AND (Reading Comprehension) AND (mainsubject(Child\*) OR mainsubject(Infants)) AND (mainsubject(Bilingual\*) OR mainsubject(Multilingual\*) OR mainsubject(Second Language Learner\*))
