# Supplementary material
Source: publisher figshare collection journal article supplement (https://asha.figshare.com/articles/dataset/_/23880465)
Supplement: Supplementary file 7 [file 1]

**Supplemental Material S8.** Precursor-outcome associations assessed in one language for simultaneous bilingual children.

Table of significant and non-significant within- and cross-language precursor-outcome associations for the literacy precursors (indicated on the left, along with number of studies assessed) and/or reading outcome measures assessed in one bilingual language – along with the language(s) of assessment (as denoted by <sup>PL</sup> and <sup>OL</sup>). S8 indicates significant and non-significant associations between given literacy precursors (indicated on the left) and reading outcome measures, as reported by the individual studies listed in S4.

| <i>Literacy Precursors and Outcomes Assessed in One Language</i> |                                                    |                                   | <i>Literacy Precursors Assessed in Both Languages and Outcomes Assessed in One Language</i> |                                                 | <i>Literacy Precursors Assessed in One Language and Outcomes Assessed in Both Languages</i> |                                               |                                                 |
|------------------------------------------------------------------|----------------------------------------------------|-----------------------------------|---------------------------------------------------------------------------------------------|-------------------------------------------------|---------------------------------------------------------------------------------------------|-----------------------------------------------|-------------------------------------------------|
|                                                                  | <i>Significant Within-Language</i>                 | <i>Significant Cross-Language</i> | <i>Not Significant (Within-Language)</i>                                                    | <i>Significant Within-Language</i>              | <i>Significant Cross-Language</i>                                                           | <i>Significant Within-Language</i>            | <i>Significant Cross-Language</i>               |
| <b>Literacy Precursors</b><br>( <i>n</i> = number of studies)    |                                                    |                                   |                                                                                             |                                                 |                                                                                             |                                               |                                                 |
| <b>Phonological Awareness</b> ( <i>n</i> = 13)                   | 2 <sup>PL &amp; OL</sup> (English);                |                                   | 36 Heterogeneous(dominant)-German and German (dominant)-Heterogenous                        | 1 <sup>PL</sup> (Chinese and English)           | 1 <sup>PL</sup> (Chinese and English)                                                       |                                               | 38 <sup>PL &amp; OL</sup> (English and Chinese) |
|                                                                  | 4 <sup>PL &amp; OL</sup> (English);                |                                   |                                                                                             | <sup>OL</sup> (English);                        | <sup>OL</sup> (English);                                                                    |                                               |                                                 |
|                                                                  | <sup>+7</sup> (Heterogenous-English bilinguals)    |                                   | <sup>PL &amp; OL</sup> (German)                                                             | 32 <sup>PL &amp; OL</sup> (Chinese and English) | 32 <sup>PL</sup> (Chinese and English)                                                      |                                               |                                                 |
|                                                                  | <sup>PL &amp; OL</sup> (English);                  |                                   |                                                                                             |                                                 | <sup>OL</sup> (English);                                                                    |                                               |                                                 |
|                                                                  | 8 <sup>PL &amp; OL</sup> (English);                |                                   |                                                                                             |                                                 | 35 <sup>PL</sup> (Spanish and English; Chinese and English)                                 |                                               |                                                 |
|                                                                  | 9 <sup>PL &amp; OL</sup> (Hebrew);                 |                                   |                                                                                             |                                                 | <sup>OL</sup> (English)                                                                     |                                               |                                                 |
|                                                                  | <sup>+19</sup> <sup>PL &amp; OL</sup> (Kiswahili); |                                   |                                                                                             |                                                 |                                                                                             |                                               |                                                 |
|                                                                  | <sup>+23</sup> <sup>PL &amp; OL</sup> (English)    |                                   |                                                                                             |                                                 |                                                                                             |                                               |                                                 |
| <b>Letter Knowledge</b><br>( <i>n</i> = 1)                       | <sup>+24</sup> <sup>PL &amp; OL</sup> (German)     |                                   |                                                                                             |                                                 |                                                                                             |                                               |                                                 |
|                                                                  | 4 <sup>PL &amp; OL</sup> (English)                 |                                   |                                                                                             |                                                 |                                                                                             |                                               |                                                 |
| <b>RAN/Serial Recall</b><br>( <i>n</i> = 4)                      | 4 <sup>PL &amp; OL</sup> (English)                 |                                   | 26 <sup>PL &amp; OL</sup> (Dutch);                                                          |                                                 |                                                                                             | 22 <sup>PL &amp; OL</sup> (Welsh and English) | 22 <sup>PL &amp; OL</sup> (Welsh and English)   |
|                                                                  |                                                    |                                   | 36 Heterogeneous(dominant)-German and German (dominant)-Heterogenous                        |                                                 |                                                                                             |                                               |                                                 |
| <b>Oral Language/Listening Comprehension</b> ( <i>n</i> = 2)     |                                                    |                                   | <sup>PL &amp; OL</sup> (German)                                                             |                                                 |                                                                                             |                                               |                                                 |
|                                                                  | 16 <sup>PL &amp; OL</sup> (English);               |                                   |                                                                                             |                                                 |                                                                                             |                                               |                                                 |
|                                                                  | 41 <sup>PL &amp; OL</sup> (Norwegian)              |                                   |                                                                                             |                                                 |                                                                                             |                                               |                                                 |

|                                             |                                                                       |                                                                                                            |                                                                |                                                                |                                       |                                      |
|---------------------------------------------|-----------------------------------------------------------------------|------------------------------------------------------------------------------------------------------------|----------------------------------------------------------------|----------------------------------------------------------------|---------------------------------------|--------------------------------------|
| Receptive Vocabulary<br>( <i>n</i> = 14)    | 1 <sup>PL &amp; OL</sup> (English);                                   |                                                                                                            | 8 <sup>PL</sup> (Malay, Tamil or Mandarin-Chinese and English) | 8 <sup>PL</sup> (Malay, Tamil or Mandarin-Chinese and English) | 22 <sup>PL</sup> (Welsh)              | 22 <sup>PL</sup> (Welsh)             |
|                                             | 16 <sup>PL &amp; OL</sup> (English);                                  |                                                                                                            |                                                                |                                                                | <sup>OL</sup> (Welsh and English)     | <sup>OL</sup> (Welsh and English)    |
|                                             | 19 <sup>PL &amp; OL</sup> (Kiswahili);                                |                                                                                                            | <sup>OL</sup> (English);                                       | <sup>OL</sup> (English);                                       |                                       |                                      |
|                                             | 23 <sup>PL &amp; OL</sup> (English);                                  |                                                                                                            | 21 <sup>PL</sup> (Norwegian and Urdu)                          | 21 <sup>PL</sup> (Norwegian and Urdu)                          |                                       |                                      |
|                                             | 26 <sup>PL &amp; OL</sup> (Dutch);                                    |                                                                                                            | <sup>OL</sup> (Norwegian)                                      | <sup>OL</sup> (Norwegian);                                     |                                       |                                      |
|                                             | 36 Heterogeneous (dominant)-German and German (dominant)-Heterogenous |                                                                                                            | 30 <sup>PL</sup> (Turkish and Dutch)                           | 35 <sup>PL</sup> (Spanish and English; Chinese and English)    |                                       |                                      |
|                                             | <sup>PL &amp; OL</sup> (German);                                      |                                                                                                            | <sup>OL</sup> (Dutch)                                          | <sup>OL</sup> (English)                                        |                                       |                                      |
|                                             | 37 <sup>PL &amp; OL</sup> (English);                                  |                                                                                                            |                                                                |                                                                |                                       |                                      |
|                                             | 39 <sup>PL &amp; OL</sup> (English);                                  |                                                                                                            |                                                                |                                                                |                                       |                                      |
|                                             | 41 <sup>PL &amp; OL</sup> (Norwegian)                                 |                                                                                                            |                                                                |                                                                |                                       |                                      |
| Expressive Vocabulary<br>( <i>n</i> = 3)    | 24 <sup>PL &amp; OL</sup> (German);                                   |                                                                                                            |                                                                | 6 <sup>PL</sup> (Spanish and English)                          |                                       |                                      |
|                                             | 39 <sup>PL &amp; OL</sup> (English)                                   |                                                                                                            |                                                                | <sup>OL</sup> (English)                                        |                                       |                                      |
| Syntactic Awareness<br>( <i>n</i> = 3)      | 4 <sup>PL &amp; OL</sup> (English);                                   |                                                                                                            |                                                                |                                                                |                                       |                                      |
|                                             | 36 Heterogeneous (dominant)-German and German (dominant)-Heterogenous |                                                                                                            |                                                                |                                                                |                                       |                                      |
|                                             | <sup>PL &amp; OL</sup> (German);                                      |                                                                                                            |                                                                |                                                                |                                       |                                      |
|                                             | 37 <sup>PL &amp; OL</sup> (English)                                   |                                                                                                            |                                                                |                                                                |                                       |                                      |
| Morphological Awareness<br>( <i>n</i> = 7)  | 23 <sup>PL &amp; OL</sup> (English);                                  | 1 <sup>PL</sup> (Chinese)                                                                                  |                                                                |                                                                | 5 <sup>PL</sup> (English)             | 5 <sup>PL</sup> (English)            |
|                                             | 36 Heterogeneous (dominant)-German and German (dominant)-Heterogenous | <sup>OL</sup> (English)                                                                                    |                                                                |                                                                | <sup>OL</sup> (Malay and English)     | <sup>OL</sup> (Malay and English)    |
|                                             | <sup>PL &amp; OL</sup> (German);                                      | ^ns across language associations (different languages assessed for literacy precursor and outcome measure) |                                                                | 35 <sup>PL</sup> (Spanish and English; Chinese and English)    |                                       |                                      |
|                                             | 37 <sup>PL &amp; OL</sup> (English);                                  |                                                                                                            |                                                                | <sup>OL</sup> (English)                                        |                                       |                                      |
|                                             | 41 <sup>PL &amp; OL</sup> (Norwegian)                                 |                                                                                                            |                                                                |                                                                |                                       |                                      |
|                                             |                                                                       |                                                                                                            |                                                                |                                                                |                                       |                                      |
| Working Memory<br>( <i>n</i> = 3)           | 39 <sup>PL &amp; OL</sup> (English)                                   | 31 <sup>PL &amp; OL</sup> (English);                                                                       |                                                                |                                                                |                                       |                                      |
|                                             |                                                                       | 36 Heterogeneous(dominant)-German and German (dominant)-Heterogenous                                       |                                                                |                                                                |                                       |                                      |
|                                             |                                                                       | <sup>PL &amp; OL</sup> (German)                                                                            |                                                                |                                                                |                                       |                                      |
| Verbal Short-Term Memory<br>( <i>n</i> = 1) |                                                                       | 4 <sup>PL &amp; OL</sup> (English)                                                                         |                                                                |                                                                |                                       |                                      |
|                                             |                                                                       |                                                                                                            |                                                                |                                                                |                                       |                                      |
| Nonverbal Intelligence<br>( <i>n</i> = 5)   | 32 <sup>OL</sup> (English);                                           | 39 <sup>PL &amp; OL</sup> (English)                                                                        | 31 <sup>OL</sup> (English)                                     |                                                                | 22 <sup>OL</sup> (Welsh and English); | 22 <sup>OL</sup> (Welsh and English) |
|                                             | 37 <sup>PL &amp; OL</sup> (English)                                   |                                                                                                            |                                                                |                                                                |                                       |                                      |

|                                                                       |                                        |                                                                          |                                            |
|-----------------------------------------------------------------------|----------------------------------------|--------------------------------------------------------------------------|--------------------------------------------|
| <b>Word/Nonword Decoding</b> ( <i>n</i> = 8)                          | 21 <sup>PL &amp; OL</sup> (Norwegian); | 26 <sup>PL &amp; OL</sup> (Dutch)                                        |                                            |
|                                                                       | 23 <sup>PL &amp; OL</sup> (English);   |                                                                          |                                            |
|                                                                       | 24 <sup>PL &amp; OL</sup> (German);    |                                                                          |                                            |
|                                                                       | 30 <sup>PL &amp; OL</sup> (Dutch);     |                                                                          |                                            |
|                                                                       | 37 <sup>PL &amp; OL</sup> (English);   |                                                                          |                                            |
|                                                                       | 39 <sup>PL &amp; OL</sup> (English);   |                                                                          |                                            |
|                                                                       | 41 <sup>PL &amp; OL</sup> (Norwegian)  |                                                                          |                                            |
| <b>Semantic Awareness</b> ( <i>n</i> = 3)                             |                                        | 7(Heterogenous-English bilinguals)                                       |                                            |
|                                                                       |                                        | <sup>PL &amp; OL</sup> (English);                                        |                                            |
|                                                                       |                                        | 9 <sup>PL &amp; OL</sup> (Hebrew);                                       |                                            |
|                                                                       |                                        | 26 <sup>PL &amp; OL</sup> (Dutch)                                        |                                            |
| <b>Spelling</b> ( <i>n</i> = 1)                                       | 4 <sup>PL &amp; OL</sup> (English)     |                                                                          |                                            |
| <b>VA Span</b> ( <i>n</i> = 1)                                        |                                        |                                                                          | 34 <sup>PL</sup> (Spanish, French, Basque) |
|                                                                       |                                        |                                                                          | <sup>OL</sup> (Basque)                     |
| <b>Orthographic Processing</b> ( <i>n</i> = 1)                        | 2 <sup>PL &amp; OL</sup> (English);    |                                                                          |                                            |
| <b>Environmental Print Awareness</b> ( <i>n</i> = 1)                  | 4 <sup>PL &amp; OL</sup> (English)     |                                                                          |                                            |
| <b>Sublexical/Phonological Speech Perception Task</b> ( <i>n</i> = 1) | 28 <sup>PL &amp; OL</sup> (Spanish)    |                                                                          |                                            |
| <b>Sentence Priming Task</b> ( <i>n</i> = 1)                          |                                        | 29 <sup>PL &amp; OL</sup> (Hebrew)                                       |                                            |
|                                                                       |                                        | ^Different languages assessed for literacy precursor and outcome measure |                                            |
| <b>Novel Word Learning</b> ( <i>n</i> = 1)                            | 39 <sup>PL &amp; OL</sup> (English)    |                                                                          |                                            |

*Note.* ^ = specifies additional information; ns= not significant; += Studies (7, 19, 23, 24) that only assessed phonemic awareness; <sup>PL</sup>= (precursor language) indicates language assessed for literacy precursor measures; <sup>OL</sup>= (outcome language) indicates language assessed for reading outcome measures. The term *within-language precursor-outcome associations* refer to associations between literacy precursors and reading outcomes assessed in the same language. The term *cross-language precursor-outcome* associations refer to precursors and outcomes assessed in two different languages.
