# Supplementary material
Source: publisher figshare collection journal article supplement (https://asha.figshare.com/articles/dataset/_/23880465)
Supplement: Supplementary file 8 [file 1]

|                                                 |                                           |                    |                              |                               |  |  |                                                                      |
|-------------------------------------------------|-------------------------------------------|--------------------|------------------------------|-------------------------------|--|--|----------------------------------------------------------------------|
| Syntactic Awareness<br><br>( <i>n</i> = 5)      | 4*Heterogeneous-English;                  |                    |                              |                               |  |  |                                                                      |
|                                                 | 17*Italian-English (Italian and English); |                    | 17*Italian-English (Italian) | 17*Italian-English (English); |  |  |                                                                      |
|                                                 | 37*Heterogeneous-English                  | 33*Chinese-English |                              | 33*Chinese-English            |  |  | 33*Chinese-English;                                                  |
|                                                 |                                           |                    |                              |                               |  |  | 36*Heterogeneous(dominant)-German and German (dominant)-Heterogenous |
|                                                 |                                           |                    |                              |                               |  |  | ;37*Heterogeneous-English                                            |
| Morphological Awareness<br><br>( <i>n</i> = 11) |                                           | 1*Chinese-English  |                              |                               |  |  |                                                                      |
|                                                 | 3*Chinese-English;                        |                    |                              |                               |  |  |                                                                      |
|                                                 | 5*Malay-English                           |                    | 5*Malay-English              |                               |  |  |                                                                      |
|                                                 | +23*Chinese-English;                      |                    |                              |                               |  |  | +23*Chinese-English;                                                 |
|                                                 | 33*Chinese-English;                       |                    | 33*Chinese-English           |                               |  |  | 33*Chinese-English;                                                  |
|                                                 | 35*Spanish-English and Chinese-English;   |                    |                              |                               |  |  | 36*Heterogeneous(dominant)-German and German(dominant)-Heterogenous  |
|                                                 | 37*Heterogeneous-English;                 |                    |                              |                               |  |  | ;                                                                    |
|                                                 | 38*Chinese-English;                       |                    |                              |                               |  |  | 37*Heterogeneous-English;                                            |
|                                                 | 40*Spanish-English;                       |                    |                              |                               |  |  | 40*Spanish-English;                                                  |
|                                                 | 41*Heterogenous-Norwegian                 |                    |                              |                               |  |  | 41*Heterogenous-Norwegian                                            |

|                                                        |                                                                                                         |                               |                                           |  |  |
|--------------------------------------------------------|---------------------------------------------------------------------------------------------------------|-------------------------------|-------------------------------------------|--|--|
| <b>Working Memory</b><br><br>( <i>n</i> = 5)           | 17*Italian-English (Italian)                                                                            | 17*Italian-English (English); | 17*Italian-English (Italian and English); |  |  |
|                                                        |                                                                                                         | 31*Chinese-English;           |                                           |  |  |
|                                                        |                                                                                                         | 33*Chinese-English;           |                                           |  |  |
|                                                        |                                                                                                         | 39*Urdu-English               |                                           |  |  |
| <b>Verbal Short-Term Memory</b><br><br>( <i>n</i> = 1) |                                                                                                         |                               |                                           |  |  |
|                                                        |                                                                                                         |                               |                                           |  |  |
| <b>Nonverbal Intelligence</b><br><br>( <i>n</i> = 8)   | 22*Welsh-English;<br><br>32*Chinese-English;<br><br>37*Heterogeneous-English;<br><br>38*Chinese-English | 31*Chinese-English;           | 33*Chinese-English                        |  |  |
|                                                        |                                                                                                         | 33*Chinese-English;           |                                           |  |  |
|                                                        |                                                                                                         | 39*Urdu-English               |                                           |  |  |
|                                                        |                                                                                                         |                               |                                           |  |  |
| <b>Word/Nonword Decoding</b><br><br>( <i>n</i> = 10)   |                                                                                                         |                               |                                           |  |  |
|                                                        |                                                                                                         |                               |                                           |  |  |
|                                                        |                                                                                                         |                               |                                           |  |  |
|                                                        |                                                                                                         |                               |                                           |  |  |
|                                                        |                                                                                                         |                               |                                           |  |  |
|                                                        |                                                                                                         |                               |                                           |  |  |
|                                                        |                                                                                                         |                               |                                           |  |  |
|                                                        |                                                                                                         |                               |                                           |  |  |
|                                                        |                                                                                                         |                               |                                           |  |  |
|                                                        |                                                                                                         |                               |                                           |  |  |
|                                                        |                                                                                                         |                               |                                           |  |  |
|                                                        |                                                                                                         |                               |                                           |  |  |
|                                                        |                                                                                                         |                               |                                           |  |  |
|                                                        |                                                                                                         |                               |                                           |  |  |
|                                                        |                                                                                                         |                               |                                           |  |  |
|                                                        |                                                                                                         |                               |                                           |  |  |
|                                                        |                                                                                                         |                               |                                           |  |  |
|                                                        |                                                                                                         |                               |                                           |  |  |
|                                                        |                                                                                                         |                               |                                           |  |  |
|                                                        |                                                                                                         |                               |                                           |  |  |
|                                                        |                                                                                                         |                               |                                           |  |  |
|                                                        |                                                                                                         |                               |                                           |  |  |
|                                                        |                                                                                                         |                               |                                           |  |  |
|                                                        |                                                                                                         |                               |                                           |  |  |
|                                                        |                                                                                                         |                               |                                           |  |  |
|                                                        |                                                                                                         |                               |                                           |  |  |
|                                                        |                                                                                                         |                               |                                           |  |  |
|                                                        |                                                                                                         |                               |                                           |  |  |
|                                                        |                                                                                                         |                               |                                           |  |  |
|                                                        |                                                                                                         |                               |                                           |  |  |
|                                                        |                                                                                                         |                               |                                           |  |  |
|                                                        |                                                                                                         |                               |                                           |  |  |
|                                                        |                                                                                                         |                               |                                           |  |  |
|                                                        |                                                                                                         |                               |                                           |  |  |
|                                                        |                                                                                                         |                               |                                           |  |  |
|                                                        |                                                                                                         |                               |                                           |  |  |
|                                                        |                                                                                                         |                               |                                           |  |  |
|                                                        |                                                                                                         |                               |                                           |  |  |
|                                                        |                                                                                                         |                               |                                           |  |  |
|                                                        |                                                                                                         |                               |                                           |  |  |
|                                                        |                                                                                                         |                               |                                           |  |  |
|                                                        |                                                                                                         |                               |                                           |  |  |
|                                                        |                                                                                                         |                               |                                           |  |  |
|                                                        |                                                                                                         |                               |                                           |  |  |
|                                                        |                                                                                                         |                               |                                           |  |  |
|                                                        |                                                                                                         |                               |                                           |  |  |
|                                                        |                                                                                                         |                               |                                           |  |  |
|                                                        |                                                                                                         |                               |                                           |  |  |
|                                                        |                                                                                                         |                               |                                           |  |  |
|                                                        |                                                                                                         |                               |                                           |  |  |
|                                                        |                                                                                                         |                               |                                           |  |  |
|                                                        |                                                                                                         |                               |                                           |  |  |
|                                                        |                                                                                                         |                               |                                           |  |  |
|                                                        |                                                                                                         |                               |                                           |  |  |
|                                                        |                                                                                                         |                               |                                           |  |  |
|                                                        |                                                                                                         |                               |                                           |  |  |
|                                                        |                                                                                                         |                               |                                           |  |  |
|                                                        |                                                                                                         |                               |                                           |  |  |
|                                                        |                                                                                                         |                               |                                           |  |  |
|                                                        |                                                                                                         |                               |                                           |  |  |
|                                                        |                                                                                                         |                               |                                           |  |  |
|                                                        |                                                                                                         |                               |                                           |  |  |
|                                                        |                                                                                                         |                               |                                           |  |  |
|                                                        |                                                                                                         |                               |                                           |  |  |
|                                                        |                                                                                                         |                               |                                           |  |  |
|                                                        |                                                                                                         |                               |                                           |  |  |
|                                                        |                                                                                                         |                               |                                           |  |  |
|                                                        |                                                                                                         |                               |                                           |  |  |
|                                                        |                                                                                                         |                               |                                           |  |  |
|                                                        |                                                                                                         |                               |                                           |  |  |
|                                                        |                                                                                                         |                               |                                           |  |  |
|                                                        |                                                                                                         |                               |                                           |  |  |
|                                                        |                                                                                                         |                               |                                           |  |  |
|                                                        |                                                                                                         |                               |                                           |  |  |
|                                                        |                                                                                                         |                               |                                           |  |  |
|                                                        |                                                                                                         |                               |                                           |  |  |
|                                                        |                                                                                                         |                               |                                           |  |  |
|                                                        |                                                                                                         |                               |                                           |  |  |
|                                                        |                                                                                                         |                               |                                           |  |  |
|                                                        |                                                                                                         |                               |                                           |  |  |
|                                                        |                                                                                                         |                               |                                           |  |  |
|                                                        |                                                                                                         |                               |                                           |  |  |
|                                                        |                                                                                                         |                               |                                           |  |  |
|                                                        |                                                                                                         |                               |                                           |  |  |
|                                                        |                                                                                                         |                               |                                           |  |  |
|                                                        |                                                                                                         |                               |                                           |  |  |
|                                                        |                                                                                                         |                               |                                           |  |  |
|                                                        |                                                                                                         |                               |                                           |  |  |
|                                                        |                                                                                                         |                               |                                           |  |  |
|                                                        |                                                                                                         |                               |                                           |  |  |
|                                                        |                                                                                                         |                               |                                           |  |  |
|                                                        |                                                                                                         |                               |                                           |  |  |
|                                                        |                                                                                                         |                               |                                           |  |  |
|                                                        |                                                                                                         |                               |                                           |  |  |
|                                                        |                                                                                                         |                               |                                           |  |  |
|                                                        |                                                                                                         |                               |                                           |  |  |
|                                                        |                                                                                                         |                               |                                           |  |  |
|                                                        |                                                                                                         |                               |                                           |  |  |
|                                                        |                                                                                                         |                               |                                           |  |  |
|                                                        |                                                                                                         |                               |                                           |  |  |
|                                                        |                                                                                                         |                               |                                           |  |  |
|                                                        |                                                                                                         |                               |                                           |  |  |
|                                                        |                                                                                                         |                               |                                           |  |  |
|                                                        |                                                                                                         |                               |                                           |  |  |
|                                                        |                                                                                                         |                               |                                           |  |  |
|                                                        |                                                                                                         |                               |                                           |  |  |
|                                                        |                                                                                                         |                               |                                           |  |  |
|                                                        |                                                                                                         |                               |                                           |  |  |
|                                                        |                                                                                                         |                               |                                           |  |  |
|                                                        |                                                                                                         |                               |                                           |  |  |
|                                                        |                                                                                                         |                               |                                           |  |  |
|                                                        |                                                                                                         |                               |                                           |  |  |
|                                                        |                                                                                                         |                               |                                           |  |  |
|                                                        |                                                                                                         |                               |                                           |  |  |
|                                                        |                                                                                                         |                               |                                           |  |  |
|                                                        |                                                                                                         |                               |                                           |  |  |
|                                                        |                                                                                                         |                               |                                           |  |  |
|                                                        |                                                                                                         |                               |                                           |  |  |
|                                                        |                                                                                                         |                               |                                           |  |  |
|                                                        |                                                                                                         |                               |                                           |  |  |
|                                                        |                                                                                                         |                               |                                           |  |  |
|                                                        |                                                                                                         |                               |                                           |  |  |
|                                                        |                                                                                                         |                               |                                           |  |  |
|                                                        |                                                                                                         |                               |                                           |  |  |
|                                                        |                                                                                                         |                               |                                           |  |  |
|                                                        |                                                                                                         |                               |                                           |  |  |
|                                                        |                                                                                                         |                               |                                           |  |  |
|                                                        |                                                                                                         |                               |                                           |  |  |
|                                                        |                                                                                                         |                               |                                           |  |  |
|                                                        |                                                                                                         |                               |                                           |  |  |
|                                                        |                                                                                                         |                               |                                           |  |  |
|                                                        |                                                                                                         |                               |                                           |  |  |
|                                                        |                                                                                                         |                               |                                           |  |  |
|                                                        |                                                                                                         |                               |                                           |  |  |
|                                                        |                                                                                                         |                               |                                           |  |  |
|                                                        |                                                                                                         |                               |                                           |  |  |
|                                                        |                                                                                                         |                               |                                           |  |  |
|                                                        |                                                                                                         |                               |                                           |  |  |
|                                                        |                                                                                                         |                               |                                           |  |  |
|                                                        |                                                                                                         |                               |                                           |  |  |
|                                                        |                                                                                                         |                               |                                           |  |  |
|                                                        |                                                                                                         |                               |                                           |  |  |
|                                                        |                                                                                                         |                               |                                           |  |  |
|                                                        |                                                                                                         |                               |                                           |  |  |
|                                                        |                                                                                                         |                               |                                           |  |  |
|                                                        |                                                                                                         |                               |                                           |  |  |
|                                                        |                                                                                                         |                               |                                           |  |  |
|                                                        |                                                                                                         |                               |                                           |  |  |
|                                                        |                                                                                                         |                               |                                           |  |  |
|                                                        |                                                                                                         |                               |                                           |  |  |
|                                                        |                                                                                                         |                               |                                           |  |  |
|                                                        |                                                                                                         |                               |                                           |  |  |
|                                                        |                                                                                                         |                               |                                           |  |  |
|                                                        |                                                                                                         |                               |                                           |  |  |
|                                                        |                                                                                                         |                               |                                           |  |  |
|                                                        |                                                                                                         |                               |                                           |  |  |
|                                                        |                                                                                                         |                               |                                           |  |  |
|                                                        |                                                                                                         |                               |                                           |  |  |
|                                                        |                                                                                                         |                               |                                           |  |  |
|                                                        |                                                                                                         |                               |                                           |  |  |
|                                                        |                                                                                                         |                               |                                           |  |  |
|                                                        |                                                                                                         |                               |                                           |  |  |
|                                                        |                                                                                                         |                               |                                           |  |  |
|                                                        |                                                                                                         |                               |                                           |  |  |
|                                                        |                                                                                                         |                               |                                           |  |  |
|                                                        |                                                                                                         |                               |                                           |  |  |
|                                                        |                                                                                                         |                               |                                           |  |  |
|                                                        |                                                                                                         |                               |                                           |  |  |
|                                                        |                                                                                                         |                               |                                           |  |  |
|                                                        |                                                                                                         |                               |                                           |  |  |
|                                                        |                                                                                                         |                               |                                           |  |  |
|                                                        |                                                                                                         |                               |                                           |  |  |
|                                                        |                                                                                                         |                               |                                           |  |  |
|                                                        |                                                                                                         |                               |                                           |  |  |
|                                                        |                                                                                                         |                               |                                           |  |  |
|                                                        |                                                                                                         |                               |                                           |  |  |
|                                                        |                                                                                                         |                               |                                           |  |  |
|                                                        |                                                                                                         |                               |                                           |  |  |
|                                                        |                                                                                                         |                               |                                           |  |  |
|                                                        |                                                                                                         |                               |                                           |  |  |
|                                                        |                                                                                                         |                               |                                           |  |  |
|                                                        |                                                                                                         |                               |                                           |  |  |
|                                                        |                                                                                                         |                               |                                           |  |  |
|                                                        |                                                                                                         |                               |                                           |  |  |
|                                                        |                                                                                                         |                               |                                           |  |  |
|                                                        |                                                                                                         |                               |                                           |  |  |
|                                                        |                                                                                                         |                               |                                           |  |  |
|                                                        |                                                                                                         |                               |                                           |  |  |
|                                                        |                                                                                                         |                               |                                           |  |  |
|                                                        |                                                                                                         |                               |                                           |  |  |
|                                                        |                                                                                                         |                               |                                           |  |  |
|                                                        |                                                                                                         |                               |                                           |  |  |
|                                                        |                                                                                                         |                               |                                           |  |  |
|                                                        |                                                                                                         |                               |                                           |  |  |
|                                                        |                                                                                                         |                               |                                           |  |  |
|                                                        |                                                                                                         |                               |                                           |  |  |
|                                                        |                                                                                                         |                               |                                           |  |  |
|                                                        |                                                                                                         |                               |                                           |  |  |
|                                                        |                                                                                                         |                               |                                           |  |  |
|                                                        |                                                                                                         |                               |                                           |  |  |
|                                                        |                                                                                                         |                               |                                           |  |  |
|                                                        |                                                                                                         |                               |                                           |  |  |
|                                                        |                                                                                                         |                               |                                           |  |  |
|                                                        |                                                                                                         |                               |                                           |  |  |
|                                                        |                                                                                                         |                               |                                           |  |  |
|                                                        |                                                                                                         |                               |                                           |  |  |
|                                                        |                                                                                                         |                               |                                           |  |  |
|                                                        |                                                                                                         |                               |                                           |  |  |
|                                                        |                                                                                                         |                               |                                           |  |  |
|                                                        |                                                                                                         |                               |                                           |  |  |
|                                                        |                                                                                                         |                               |                                           |  |  |
|                                                        |                                                                                                         |                               |                                           |  |  |
|                                                        |                                                                                                         |                               |                                           |  |  |
|                                                        |                                                                                                         |                               |                                           |  |  |
|                                                        |                                                                                                         |                               |                                           |  |  |
|                                                        |                                                                                                         |                               |                                           |  |  |
|                                                        |                                                                                                         |                               |                                           |  |  |
|                                                        |                                                                                                         |                               |                                           |  |  |
|                                                        |                                                                                                         |                               |                                           |  |  |
|                                                        |                                                                                                         |                               |                                           |  |  |
|                                                        |                                                                                                         |                               |                                           |  |  |
|                                                        |                                                                                                         |                               |                                           |  |  |
|                                                        |                                                                                                         |                               |                                           |  |  |
|                                                        |                                                                                                         |                               |                                           |  |  |
|                                                        |                                                                                                         |                               |                                           |  |  |
|                                                        |                                                                                                         |                               |                                           |  |  |
|                                                        |                                                                                                         |                               |                                           |  |  |
|                                                        |                                                                                                         |                               |                                           |  |  |
|                                                        |                                                                                                         |                               |                                           |  |  |
|                                                        |                                                                                                         |                               |                                           |  |  |
|                                                        |                                                                                                         |                               |                                           |  |  |
|                                                        |                                                                                                         |                               |                                           |  |  |
|                                                        |                                                                                                         |                               |                                           |  |  |
|                                                        |                                                                                                         |                               |                                           |  |  |
|                                                        |                                                                                                         |                               |                                           |  |  |
|                                                        |                                                                                                         |                               |                                           |  |  |
|                                                        |                                                                                                         |                               |                                           |  |  |
|                                                        |                                                                                                         |                               |                                           |  |  |
|                                                        |                                                                                                         |                               |                                           |  |  |
|                                                        |                                                                                                         |                               |                                           |  |  |
|                                                        |                                                                                                         |                               |                                           |  |  |
|                                                        |                                                                                                         |                               |                                           |  |  |
|                                                        |                                                                                                         |                               |                                           |  |  |
|                                                        |                                                                                                         |                               |                                           |  |  |
|                                                        |                                                                                                         |                               |                                           |  |  |
|                                                        |                                                                                                         |                               |                                           |  |  |
|                                                        |                                                                                                         |                               |                                           |  |  |
|                                                        |                                                                                                         |                               |                                           |  |  |
|                                                        |                                                                                                         |                               |                                           |  |  |
|                                                        |                                                                                                         |                               |                                           |  |  |
|                                                        |                                                                                                         |                               |                                           |  |  |
|                                                        |                                                                                                         |                               |                                           |  |  |
|                                                        |                                                                                                         |                               |                                           |  |  |
|                                                        |                                                                                                         |                               |                                           |  |  |
|                                                        |                                                                                                         |                               |                                           |  |  |
|                                                        |                                                                                                         |                               |                                           |  |  |
|                                                        |                                                                                                         |                               |                                           |  |  |
|                                                        |                                                                                                         |                               |                                           |  |  |
|                                                        |                                                                                                         |                               |                                           |  |  |
|                                                        |                                                                                                         |                               |                                           |  |  |
|                                                        |                                                                                                         |                               |                                           |  |  |
|                                                        |                                                                                                         |                               |                                           |  |  |
|                                                        |                                                                                                         |                               |                                           |  |  |
|                                                        |                                                                                                         |                               |                                           |  |  |
|                                                        |                                                                                                         |                               |                                           |  |  |
|                                                        |                                                                                                         |                               |                                           |  |  |
|                                                        |                                                                                                         |                               |                                           |  |  |
|                                                        |                                                                                                         |                               |                                           |  |  |
|                                                        |                                                                                                         |                               |                                           |  |  |
|                                                        |                                                                                                         |                               |                                           |  |  |
|                                                        |                                                                                                         |                               |                                           |  |  |
|                                                        |                                                                                                         |                               |                                           |  |  |
|                                                        |                                                                                                         |                               |                                           |  |  |
|                                                        |                                                                                                         |                               |                                           |  |  |
|                                                        |                                                                                                         |                               |                                           |  |  |
|                                                        |                                                                                                         |                               |                                           |  |  |
|                                                        |                                                                                                         |                               |                                           |  |  |
|                                                        |                                                                                                         |                               |                                           |  |  |
|                                                        |                                                                                                         |                               |                                           |  |  |
|                                                        |                                                                                                         |                               |                                           |  |  |
|                                                        |                                                                                                         |                               |                                           |  |  |
|                                                        |                                                                                                         |                               |                                           |  |  |
|                                                        |                                                                                                         |                               |                                           |  |  |
|                                                        |                                                                                                         |                               |                                           |  |  |
|                                                        |                                                                                                         |                               |                                           |  |  |
|                                                        |                                                                                                         |                               |                                           |  |  |
|                                                        |                                                                                                         |                               |                                           |  |  |
|                                                        |                                                                                                         |                               |                                           |  |  |
|                                                        |                                                                                                         |                               |                                           |  |  |
|                                                        |                                                                                                         |                               |                                           |  |  |
|                                                        |                                                                                                         |                               |                                           |  |  |
|                                                        |                                                                                                         |                               |                                           |  |  |
|                                                        |                                                                                                         |                               |                                           |  |  |
|                                                        |                                                                                                         |                               |                                           |  |  |
|                                                        |                                                                                                         |                               |                                           |  |  |
|                                                        |                                                                                                         |                               |                                           |  |  |
|                                                        |                                                                                                         |                               |                                           |  |  |
|                                                        |                                                                                                         |                               |                                           |  |  |
|                                                        |                                                                                                         |                               |                                           |  |  |
|                                                        |                                                                                                         |                               |                                           |  |  |
|                                                        |                                                                                                         |                               |                                           |  |  |
|                                                        |                                                                                                         |                               |                                           |  |  |
|                                                        |                                                                                                         |                               |                                           |  |  |
|                                                        |                                                                                                         |                               |                                           |  |  |
|                                                        |                                                                                                         |                               |                                           |  |  |
|                                                        |                                                                                                         |                               |                                           |  |  |
|                                                        |                                                                                                         |                               |                                           |  |  |
|                                                        |                                                                                                         |                               |                                           |  |  |
|                                                        |                                                                                                         |                               |                                           |  |  |
|                                                        |                                                                                                         |                               |                                           |  |  |
|                                                        |                                                                                                         |                               |                                           |  |  |
|                                                        |                                                                                                         |                               |                                           |  |  |
|                                                        |                                                                                                         |                               |                                           |  |  |
|                                                        |                                                                                                         |                               |                                           |  |  |
|                                                        |                                                                                                         |                               |                                           |  |  |
|                                                        |                                                                                                         |                               |                                           |  |  |
|                                                        |                                                                                                         |                               |                                           |  |  |
|                                                        |                                                                                                         |                               |                                           |  |  |
|                                                        |                                                                                                         |                               |                                           |  |  |
|                                                        |                                                                                                         |                               |                                           |  |  |
|                                                        |                                                                                                         |                               |                                           |  |  |
|                                                        |                                                                                                         |                               |                                           |  |  |
|                                                        |                                                                                                         |                               |                                           |  |  |
|                                                        |                                                                                                         |                               |                                           |  |  |
|                                                        |                                                                                                         |                               |                                           |  |  |
|                                                        |                                                                                                         |                               |                                           |  |  |
|                                                        |                                                                                                         |                               |                                           |  |  |
|                                                        |                                                                                                         |                               |                                           |  |  |
|                                                        |                                                                                                         |                               |                                           |  |  |
|                                                        |                                                                                                         |                               |                                           |  |  |
|                                                        |                                                                                                         |                               |                                           |  |  |
|                                                        |                                                                                                         |                               |                                           |  |  |
|                                                        |                                                                                                         |                               |                                           |  |  |
|                                                        |                                                                                                         |                               |                                           |  |  |
|                                                        |                                                                                                         |                               |                                           |  |  |
|                                                        |                                                                                                         |                               |                                           |  |  |
|                                                        |                                                                                                         |                               |                                           |  |  |
|                                                        |                                                                                                         |                               |                                           |  |  |
|                                                        |                                                                                                         |                               |                                           |  |  |
|                                                        |                                                                                                         |                               |                                           |  |  |
|                                                        |                                                                                                         |                               |                                           |  |  |
|                                                        |                                                                                                         |                               |                                           |  |  |
|                                                        |                                                                                                         |                               |                                           |  |  |
|                                                        |                                                                                                         |                               |                                           |  |  |
|                                                        |                                                                                                         |                               |                                           |  |  |
|                                                        |                                                                                                         |                               |                                           |  |  |
|                                                        |                                                                                                         |                               |                                           |  |  |
|                                                        |                                                                                                         |                               |                                           |  |  |
|                                                        |                                                                                                         |                               |                                           |  |  |
|                                                        |                                                                                                         |                               |                                           |  |  |
|                                                        |                                                                                                         |                               |                                           |  |  |
|                                                        |                                                                                                         |                               |                                           |  |  |
|                                                        |                                                                                                         |                               |                                           |  |  |
|                                                        |                                                                                                         |                               |                                           |  |  |
|                                                        |                                                                                                         |                               |                                           |  |  |
|                                                        |                                                                                                         |                               |                                           |  |  |
|                                                        |                                                                                                         |                               |                                           |  |  |
|                                                        |                                                                                                         |                               |                                           |  |  |
|                                                        |                                                                                                         |                               |                                           |  |  |
|                                                        |                                                                                                         |                               |                                           |  |  |
|                                                        |                                                                                                         |                               |                                           |  |  |
|                                                        |                                                                                                         |                               |                                           |  |  |
|                                                        |                                                                                                         |                               |                                           |  |  |
|                                                        |                                                                                                         |                               |                                           |  |  |
|                                                        |                                                                                                         |                               |                                           |  |  |
|                                                        |                                                                                                         |                               |                                           |  |  |
|                                                        |                                                                                                         |                               |                                           |  |  |
|                                                        |                                                                                                         |                               |                                           |  |  |
|                                                        |                                                                                                         |                               |                                           |  |  |
|                                                        |                                                                                                         |                               |                                           |  |  |
|                                                        |                                                                                                         |                               |                                           |  |  |
|                                                        |                                                                                                         |                               |                                           |  |  |
|                                                        |                                                                                                         |                               |                                           |  |  |
|                                                        |                                                                                                         |                               |                                           |  |  |
|                                                        |                                                                                                         |                               |                                           |  |  |
|                                                        |                                                                                                         |                               |                                           |  |  |
|                                                        |                                                                                                         |                               |                                           |  |  |
|                                                        |                                                                                                         |                               |                                           |  |  |
|                                                        |                                                                                                         |                               |                                           |  |  |
|                                                        |                                                                                                         |                               |                                           |  |  |
|                                                        |                                                                                                         |                               |                                           |  |  |
|                                                        |                                                                                                         |                               |                                           |  |  |
|                                                        |                                                                                                         |                               |                                           |  |  |
|                                                        |                                                                                                         |                               |                                           |  |  |
|                                                        |                                                                                                         |                               |                                           |  |  |
|                                                        |                                                                                                         |                               |                                           |  |  |
|                                                        |                                                                                                         |                               |                                           |  |  |
|                                                        |                                                                                                         |                               |                                           |  |  |
|                                                        |                                                                                                         |                               |                                           |  |  |
|                                                        |                                                                                                         |                               |                                           |  |  |
|                                                        |                                                                                                         |                               |                                           |  |  |
|                                                        |                                                                                                         |                               |                                           |  |  |
|                                                        |                                                                                                         |                               |                                           |  |  |
|                                                        |                                                                                                         |                               |                                           |  |  |
|                                                        |                                                                                                         |                               |                                           |  |  |
|                                                        |                                                                                                         |                               |                                           |  |  |
|                                                        |                                                                                                         |                               |                                           |  |  |
|                                                        |                                                                                                         |                               |                                           |  |  |
|                                                        |                                                                                                         |                               |                                           |  |  |
|                                                        |                                                                                                         |                               |                                           |  |  |
|                                                        |                                                                                                         |                               |                                           |  |  |
|                                                        |                                                                                                         |                               |                                           |  |  |
|                                                        |                                                                                                         |                               |                                           |  |  |
|                                                        |                                                                                                         |                               |                                           |  |  |
|                                                        |                                                                                                         |                               |                                           |  |  |
|                                                        |                                                                                                         |                               |                                           |  |  |
|                                                        |                                                                                                         |                               |                                           |  |  |
|                                                        |                                                                                                         |                               |                                           |  |  |
|                                                        |                                                                                                         |                               |                                           |  |  |
|                                                        |                                                                                                         |                               |                                           |  |  |
|                                                        |                                                                                                         |                               |                                           |  |  |
|                                                        |                                                                                                         |                               |                                           |  |  |
|                                                        |                                                                                                         |                               |                                           |  |  |
|                                                        |                                                                                                         |                               |                                           |  |  |
|                                                        |                                                                                                         |                               |                                           |  |  |
|                                                        |                                                                                                         |                               |                                           |  |  |
|                                                        |                                                                                                         |                               |                                           |  |  |
|                                                        |                                                                                                         |                               |                                           |  |  |
|                                                        |                                                                                                         |                               |                                           |  |  |
|                                                        |                                                                                                         |                               |                                           |  |  |
|                                                        |                                                                                                         |                               |                                           |  |  |
|                                                        |                                                                                                         |                               |                                           |  |  |
|                                                        |                                                                                                         |                               |                                           |  |  |
|                                                        |                                                                                                         |                               |                                           |  |  |
|                                                        |                                                                                                         |                               |                                           |  |  |
|                                                        |                                                                                                         |                               |                                           |  |  |
|                                                        |                                                                                                         |                               |                                           |  |  |
|                                                        |                                                                                                         |                               |                                           |  |  |
|                                                        |                                                                                                         |                               |                                           |  |  |
|                                                        |                                                                                                         |                               |                                           |  |  |
|                                                        |                                                                                                         |                               |                                           |  |  |
|                                                        |                                                                                                         |                               |                                           |  |  |
|                                                        |                                                                                                         |                               |                                           |  |  |
|                                                        |                                                                                                         |                               |                                           |  |  |
|                                                        |                                                                                                         |                               |                                           |  |  |
|                                                        |                                                                                                         |                               |                                           |  |  |
|                                                        |                                                                                                         |                               |                                           |  |  |
|                                                        |                                                                                                         |                               |                                           |  |  |
|                                                        |                                                                                                         |                               |                                           |  |  |
|                                                        |                                                                                                         |                               |                                           |  |  |
|                                                        |                                                                                                         |                               |                                           |  |  |
|                                                        |                                                                                                         |                               |                                           |  |  |
|                                                        |                                                                                                         |                               |                                           |  |  |
|                                                        |                                                                                                         |                               |                                           |  |  |
|                                                        |                                                                                                         |                               |                                           |  |  |
|                                                        |                                                                                                         |                               |                                           |  |  |
|                                                        |                                                                                                         |                               |                                           |  |  |
|                                                        |                                                                                                         |                               |                                           |  |  |
|                                                        |                                                                                                         |                               |                                           |  |  |
|                                                        |                                                                                                         |                               |                                           |  |  |
|                                                        |                                                                                                         |                               |                                           |  |  |
|                                                        |                                                                                                         |                               |                                           |  |  |
|                                                        |                                                                                                         |                               |                                           |  |  |
|                                                        |                                                                                                         |                               |                                           |  |  |
|                                                        |                                                                                                         |                               |                                           |  |  |
|                                                        |                                                                                                         |                               |                                           |  |  |
|                                                        |                                                                                                         |                               |                                           |  |  |
|                                                        |                                                                                                         |                               |                                           |  |  |
|                                                        |                                                                                                         |                               |                                           |  |  |
|                                                        |                                                                                                         |                               |                                           |  |  |
|                                                        |                                                                                                         |                               |                                           |  |  |
|                                                        |                                                                                                         |                               |                                           |  |  |
|                                                        |                                                                                                         |                               |                                           |  |  |
|                                                        |                                                                                                         |                               |                                           |  |  |
|                                                        |                                                                                                         |                               |                                           |  |  |
|                                                        |                                                                                                         |                               |                                           |  |  |
|                                                        |                                                                                                         |                               |                                           |  |  |
|                                                        |                                                                                                         |                               |                                           |  |  |
|                                                        |                                                                                                         |                               |                                           |  |  |
|                                                        |                                                                                                         |                               |                                           |  |  |
|                                                        |                                                                                                         |                               |                                           |  |  |
|                                                        |                                                                                                         |                               |                                           |  |  |
|                                                        |                                                                                                         |                               |                                           |  |  |
|                                                        |                                                                                                         |                               |                                           |  |  |
|                                                        |                                                                                                         |                               |                                           |  |  |
|                                                        |                                                                                                         |                               |                                           |  |  |
|                                                        |                                                                                                         |                               |                                           |  |  |
|                                                        |                                                                                                         |                               |                                           |  |  |
|                                                        |                                                                                                         |                               |                                           |  |  |
|                                                        |                                                                                                         |                               |                                           |  |  |
|                                                        |                                                                                                         |                               |                                           |  |  |
|                                                        |                                                                                                         |                               |                                           |  |  |
|                                                        |                                                                                                         |                               |                                           |  |  |
|                                                        |                                                                                                         |                               |                                           |  |  |
|                                                        |                                                                                                         |                               |                                           |  |  |
|                                                        |                                                                                                         |                               |                                           |  |  |
|                                                        |                                                                                                         |                               |                                           |  |  |
|                                                        |                                                                                                         |                               |                                           |  |  |
|                                                        |                                                                                                         |                               |                                           |  |  |
|                                                        |                                                                                                         |                               |                                           |  |  |
|                                                        |                                                                                                         |                               |                                           |  |  |
|                                                        |                                                                                                         |                               |                                           |  |  |
|                                                        |                                                                                                         |                               |                                           |  |  |
|                                                        |                                                                                                         |                               |                                           |  |  |
|                                                        |                                                                                                         |                               |                                           |  |  |
|                                                        |                                                                                                         |                               |                                           |  |  |
|                                                        |                                                                                                         |                               |                                           |  |  |
|                                                        |                                                                                                         |                               |                                           |  |  |
|                                                        |                                                                                                         |                               |                                           |  |  |
|                                                        |                                                                                                         |                               |                                           |  |  |
|                                                        |                                                                                                         |                               |                                           |  |  |
|                                                        |                                                                                                         |                               |                                           |  |  |
|                                                        |                                                                                                         |                               |                                           |  |  |
|                                                        |                                                                                                         |                               |                                           |  |  |
|                                                        |                                                                                                         |                               |                                           |  |  |
|                                                        |                                                                                                         |                               |                                           |  |  |
|                                                        |                                                                                                         |                               |                                           |  |  |
|                                                        |                                                                                                         |                               |                                           |  |  |
|                                                        |                                                                                                         |                               |                                           |  |  |
|                                                        |                                                                                                         |                               |                                           |  |  |
|                                                        |                                                                                                         |                               |                                           |  |  |
|                                                        |                                                                                                         |                               |                                           |  |  |
|                                                        |                                                                                                         |                               |                                           |  |  |
|                                                        |                                                                                                         |                               |                                           |  |  |
|                                                        |                                                                                                         |                               |                                           |  |  |
|                                                        |                                                                                                         |                               |                                           |  |  |
|                                                        |                                                                                                         |                               |                                           |  |  |
|                                                        |                                                                                                         |                               |                                           |  |  |
|                                                        |                                                                                                         |                               |                                           |  |  |
|                                                        |                                                                                                         |                               |                                           |  |  |
|                                                        |                                                                                                         |                               |                                           |  |  |
|                                                        |                                                                                                         |                               |                                           |  |  |
|                                                        |                                                                                                         |                               |                                           |  |  |
|                                                        |                                                                                                         |                               |                                           |  |  |
|                                                        |                                                                                                         |                               |                                           |  |  |
|                                                        |                                                                                                         |                               |                                           |  |  |
|                                                        |                                                                                                         |                               |                                           |  |  |
|                                                        |                                                                                                         |                               |                                           |  |  |
|                                                        |                                                                                                         |                               |                                           |  |  |
|                                                        |                                                                                                         |                               |                                           |  |  |
|                                                        |                                                                                                         |                               |                                           |  |  |
|                                                        |                                                                                                         |                               |                                           |  |  |
|                                                        |                                                                                                         |                               |                                           |  |  |
|                                                        |                                                                                                         |                               |                                           |  |  |
|                                                        |                                                                                                         |                               |                                           |  |  |
|                                                        |                                                                                                         |                               |                                           |  |  |
